# Supplementary material
Source: PubMed Central journal article supplement (PMC3797532)

# Supplemental Fig 1

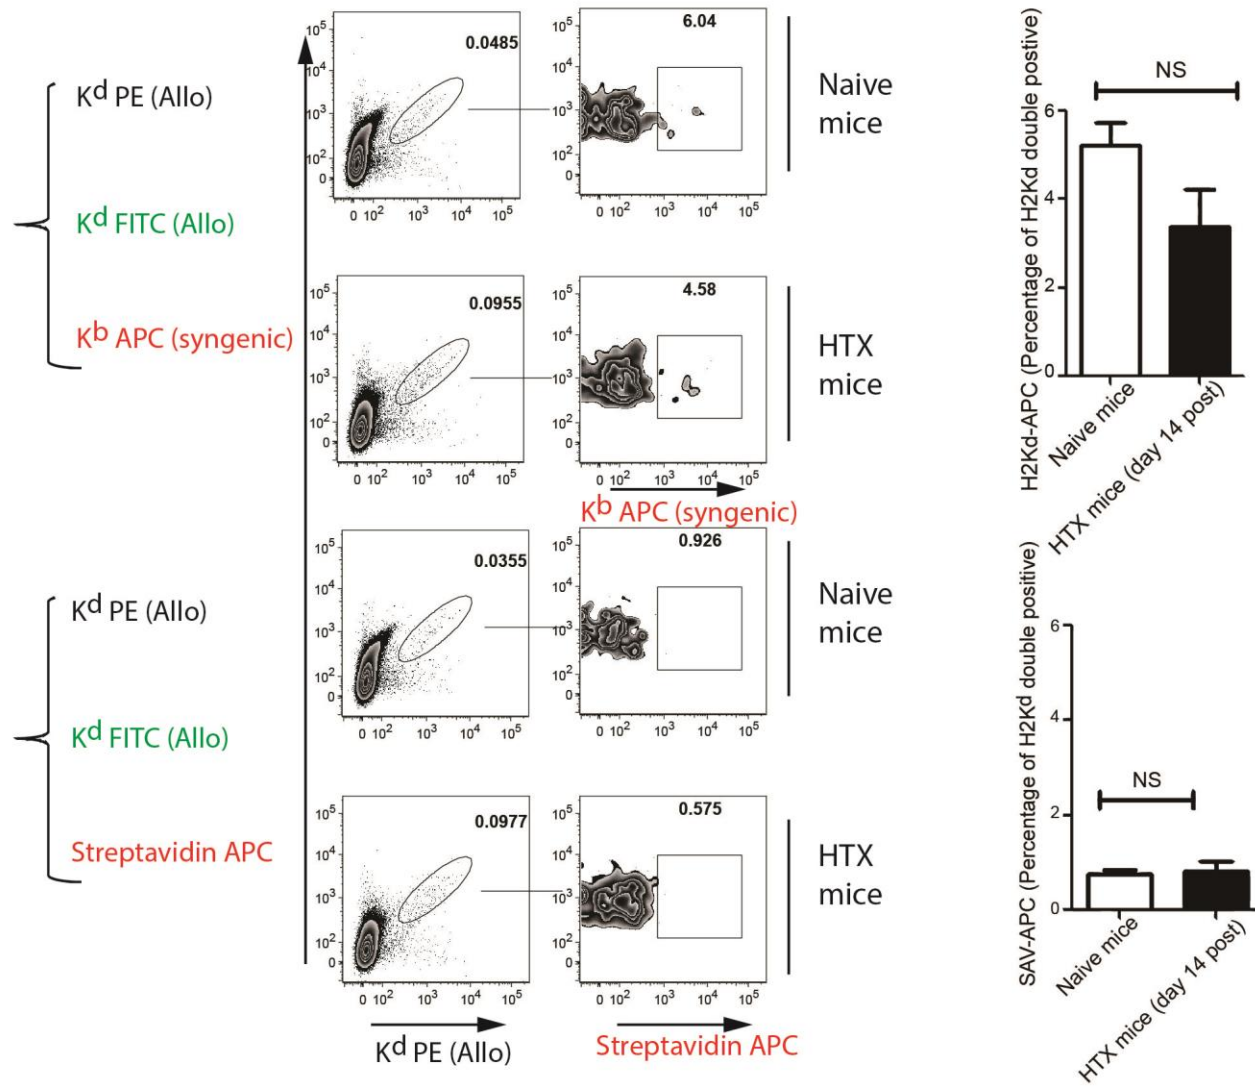

Supplemental Fig 2

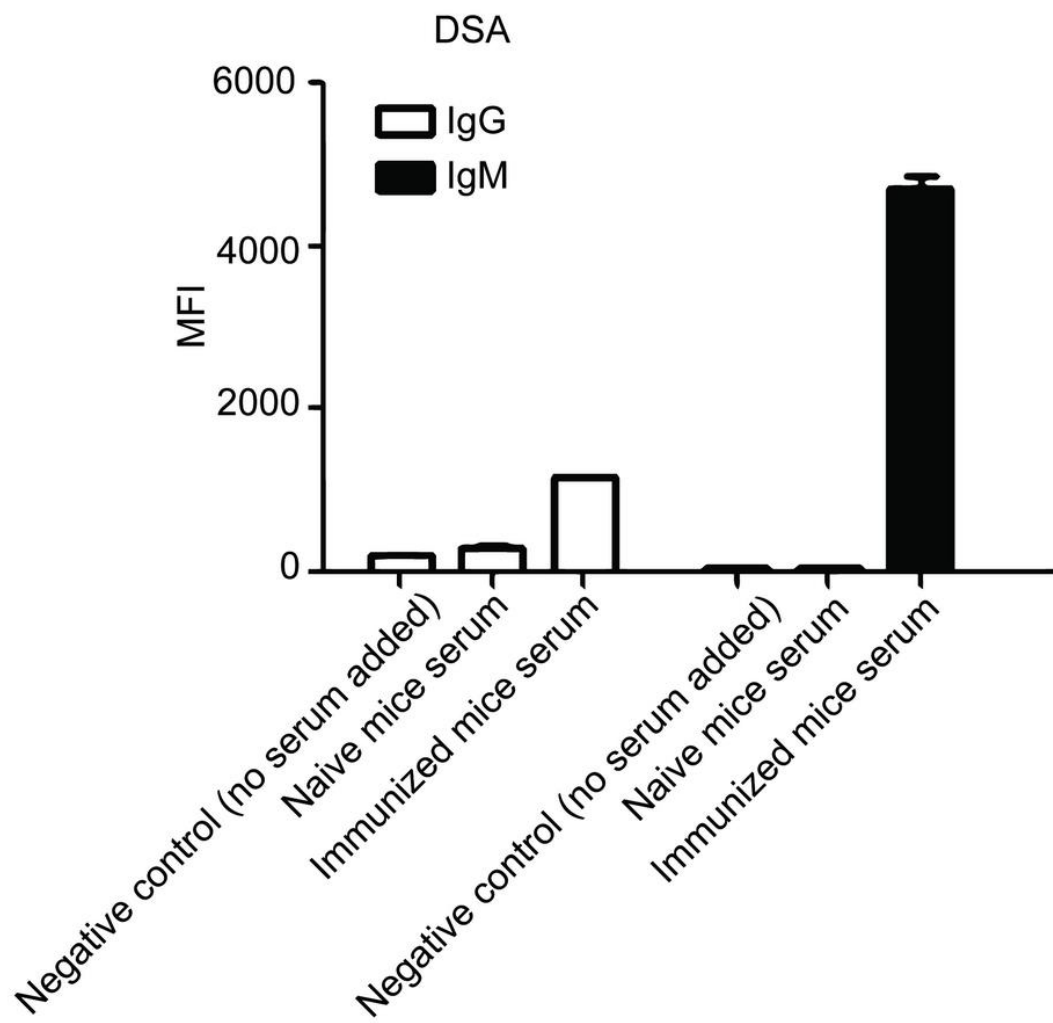

Supplemental Fig 3

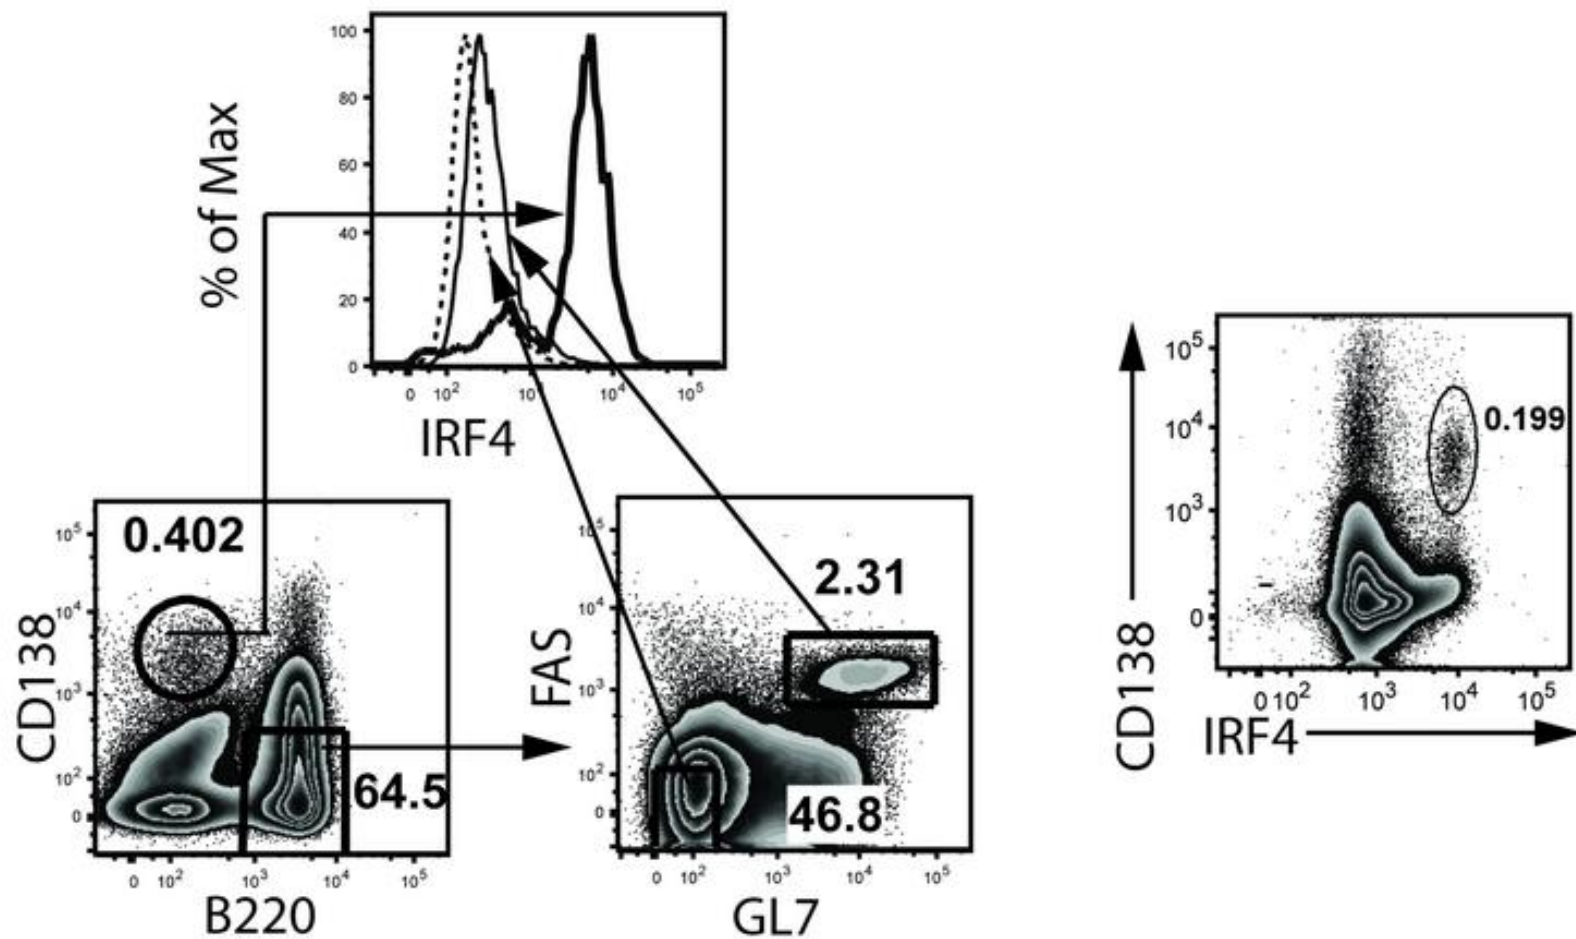

# Supplemental Fig 4

## Balb/c Immunization

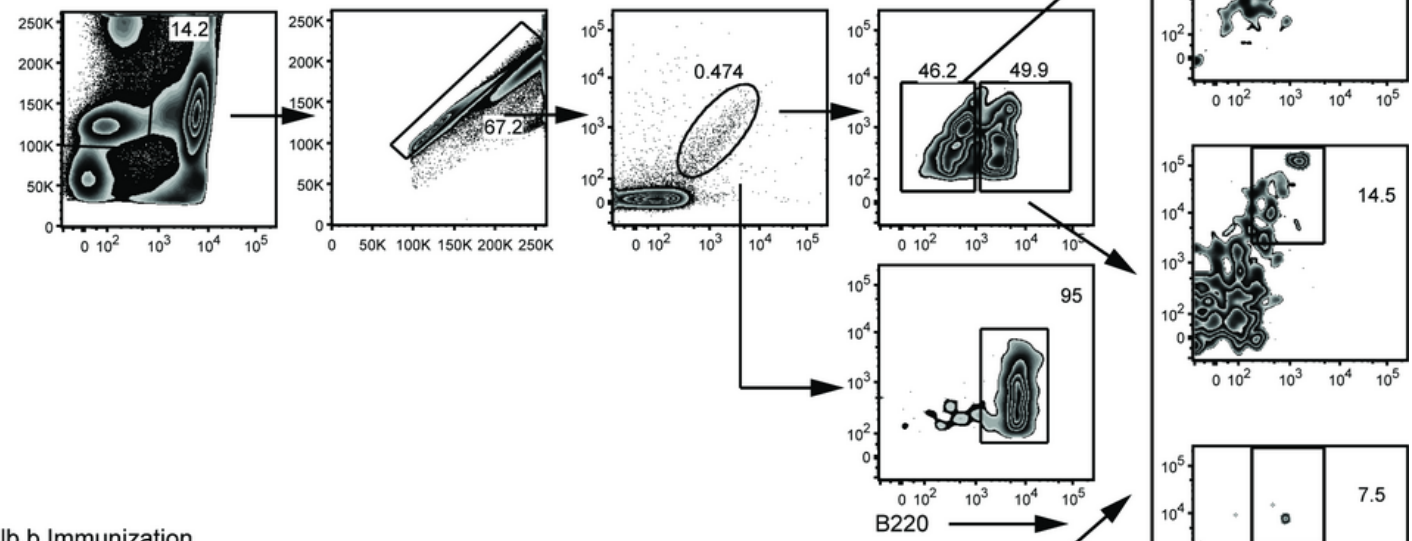

## Balb.b Immunization

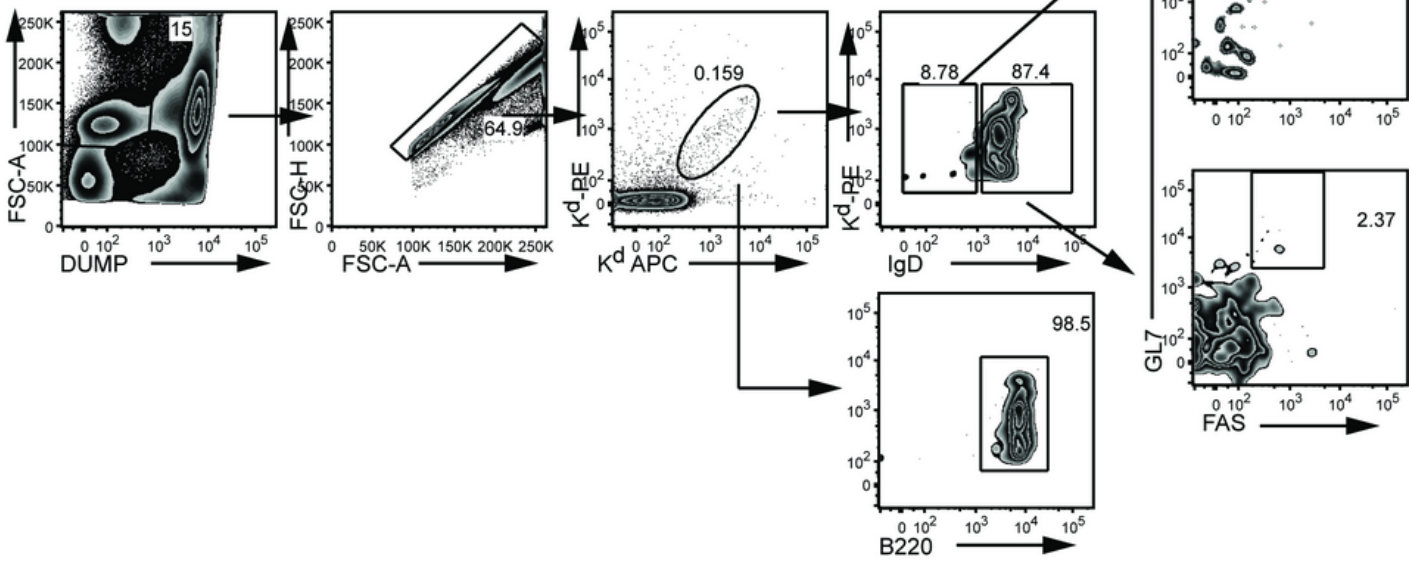

Supplement: NIHMS508087-supplement-Supp_Fig_S1-S4.pdf [file NIHMS508087-supplement-Supp_Fig_S1-S4.pdf]
